# Supplementary material for: Radiopharmaceutical Labelling for Lung Ventilation/Perfusion PET/CT Imaging: A Review of Production and Optimization Processes for Clinical Use
Source: MDPI journal article supplement (doi:10.3390/ph15050518), 2022-04-22
Supplement: s1 [file s1]

**Table S1.** [ $^{68}\text{Ga}$ ]Ga-MAA particles size and biodistribution study according to the various authors.

|                                    | Particles mean Ø<br>(µm)                | Biodistribution study                           |                                                                  | In vitro stability     |                                 |
|------------------------------------|-----------------------------------------|-------------------------------------------------|------------------------------------------------------------------|------------------------|---------------------------------|
|                                    |                                         | Animals                                         |                                                                  | Animal serum<br>(37°C) | Human serum or<br>plasma (37°C) |
|                                    |                                         | [ $^{68}\text{Ga}$ ]Ga-MAA tested<br>in animals | Activity injected (MBq)                                          |                        |                                 |
| Even and Green [24]                | 10.0 - 90.0                             | no                                              |                                                                  |                        |                                 |
| Maus <i>et al.</i> [32]            | 3.0 - 150.0 (3.0 - 40.0<br>for 95.0%)   | Sprague Dawley rats<br>(n=2)                    | 10.3 ± 1.5                                                       |                        |                                 |
| Ament <i>et al.</i> [33]           | 3.0 - 150.0 (3.0 - 40.0<br>for 95.0%)   | Sprague Dawley rats<br>(n=2)                    | 10.3 ± 1.5                                                       |                        | 1h (plasma)                     |
| Amor-Coarasa <i>et al.</i> [34]    |                                         | Sprague Dawley rats<br>(2/T°C)                  | 1.8 à 3.7                                                        |                        |                                 |
| Jain <i>et al.</i> [29]            | 52.9 ± 15.2                             | Normal swiss mice                               | 0.4                                                              | 45 min                 |                                 |
| Shannehsazzadeh <i>et al.</i> [36] | 24.31                                   | normal female wild-<br>type rats                | 6.6 (static PET/CT images)<br>1.8 MBq (dynamic PET/CT<br>images) |                        |                                 |
| Persico <i>et al.</i> [37]         | 7.0 - 100.0                             | no                                              |                                                                  |                        | 1h                              |
| Blanc-Béguin <i>et al.</i> [40]    | 15.0 - 75.0 (25.0 -<br>50.0 for 70.0 %) | no                                              |                                                                  |                        |                                 |
| Canziani <i>et al.</i> [18]        | 43.0 - 51.0                             | no                                              |                                                                  |                        |                                 |
